# Supplementary material for: Multimorbidity patterns in the elderly: a prospective cohort study with cluster analysis
Source: BMC Geriatr. 2018 Jan 16;18:16. doi: 10.1186/s12877-018-0705-7 (PMC5771078; doi:10.1186/s12877-018-0705-7)
Supplement: Supplementary file 4 — Multimorbidity patterns in men >80 years across the period analysed. Patterns defined by prevalence >20% and ratio O/E > 2. (XLSX 37 kb) [file 12877_2018_705_MOESM4_ESM.xlsx]

## Sheet: Additional file 4
	Appendix 4
	Multimorbidity patterns in men >80 years across the period analysed. Patterns defined by prevalence >20% and ratio O/E >2.
		2009				2014
	Nonspecific pattern, n=5,834 (34.1%)				Nonspecific pattern, n=9,244 (35.3%)
				O/E	Stable pattern, n=3,140 (53.8%)			O/E
			Pre*	ratio			Pre*	ratio
	Code&	Disease			Code&	Disease
	K86	Hypertension, uncomplicated	0.696606	0.977211	K86	Hypertension, uncomplicated	0.741887	1.02491
	Y85	Benign prostatic hypertrophy	0.374014	0.831807	Y85	Benign prostatic hypertrophy	0.401774	0.849094
	T93	Lipid disorder	0.286082	0.76606	T93	Lipid disorder	0.400801	0.908618
	T90	Diabetes, non-insulin dependent	0.233802	0.821231	T90	Diabetes, non-insulin dependent	0.245457	0.840204
					F92	Cataract	0.203592	0.744579
	Endocrine-metabolic pattern, n=2,411 (14.1%)				Digestive-respiratory pattern n=4,060 (15.5%)
				O/E	Stable in pattern, n=1,174 (48.7%)			O/E
			Pre*	ratio			Pre*	ratio
	Code&	Disease			Code&	Disease
	K86	Hypertension, uncomplicated	0.865201	1.21372	Y85	Benign prostatic hypertrophy	0.4867	1.02857
	T93	Lipid disorder	0.715056	1.91475	K86	Hypertension, uncomplicated	0.429064	0.592747
	T90	Diabetes, non-insulin dependent	0.6545	2.29894	R95	Chronic obstructive pulmonary disease	0.401232	2.17677
	U99	Urinary disease, other	0.482787	1.80697	F92	Cataract	0.298276	1.09086
	K76	Ischaemic heart disease without angina	0.431771	3.32058	T93	Lipid disorder	0.284975	0.646041
	Y85	Benign prostatic hypertrophy	0.405641	0.902144	R99	Respiratory disease, other	0.228818	2.23385
	K92	Atherosclerosis/peripheral vascular disease	0.318125	2.79269	D92	Diverticular disease	0.199754	2.34625
	K75	Acute myocardial infarction	0.299046	3.5642	D99	Disease digestive system, other	0.187931	2.82576
	T99	Endocrine/metabolic/nutritional disease, other	0.25674	1.74978	D98	Cholecystitis/cholelithiasis	0.168719	2.04406
	K77	Heart failure	0.242638	1.71015	D84	Oesophagus disease	0.144335	2.26789
	F92	Cataract	0.241394	0.917928	L95	Osteoporosis	0.122167	2.59104
	K84	Heart disease, other	0.216093	1.20751	D85	Duodenal ulcer	0.0965517	2.31168
	R95	Chronic obstructive pulmonary disease	0.21153	1.01595	D97	Liver disease NOS	0.0913793	2.60163
	K78	Atrial fibrillation/flutter	0.199502	0.942326	D81	Congenital anomaly, digestive system	0.08867	3.01628
	K74	Ischaemic heart disease with angina	0.180423	3.07168	D86	Peptic ulcer, other	0.0706897	2.42036
	F83	Retinopathy	0.107424	4.77885	R96	Asthma	0.0697044	2.53579
	N94	Peripheral neuritis/neuropathy	0.0941518	3.54404	D72	Viral hepatitis	0.0679803	2.90949
	K91	Cerebrovascular disease	0.0900041	2.02829	A70	Tuberculosis	0.0635468	3.78291
					P15	Chronic alcohol abuse	0.0310345	2.04757
	Muskuloskeletal pattern, n=2,373 (13.9%)				Musculoskeletal pattern, n=3,694 (14.1%)
				O/E	Stable in pattern, n=1,286 (54.2%)			O/E
			Pre*	ratio			Pre*	ratio
	Code&	Disease			Code&	Disease
	K86	Hypertension, uncomplicated	0.812895	1.14034	K86	Hypertension, uncomplicated	0.831077	1.14812
	Y85	Benign prostatic hypertrophy	0.647282	1.43955	Y85	Benign prostatic hypertrophy	0.622902	1.31642
	F92	Cataract	0.477455	1.81558	T93	Lipid disorder	0.508121	1.15191
	T93	Lipid disorder	0.432364	1.15777	F92	Cataract	0.438008	1.60189
	L90	Osteoarthritis of knee	0.39233	2.61457	L90	Osteoarthritis of knee	0.400379	2.44512
	H86	Deafness	0.337969	2.11796	T82	Obesity	0.330265	1.99507
	L91	Osteoarthritis, other	0.302992	1.78943	T90	Diabetes, non-insulin dependent	0.329995	1.12958
	U99	Urinary disease, other	0.2933	1.09776	L91	Osteoarthritis, other	0.30915	1.90531
	K84	Heart disease, other	0.255794	1.42936	U99	Urinary disease, other	0.275582	1.14341
	S99	Skin disease, other	0.255373	2.76646	H86	Deafness	0.271251	1.66977
	T82	Obesity	0.24863	2.00014	L86	Back syndrome with radiating pain	0.265566	2.67537
	T90	Diabetes, non-insulin dependent	0.245259	0.861475	L92	Shoulder syndrome	0.254196	2.97372
	L86	Back syndrome with radiating pain	0.23346	2.77671	K84	Heart disease, other	0.247428	1.39015
	F93	Glaucoma	0.219975	1.70244	T99	Endocrine/metabolic/nutritional disease, other	0.239848	1.5413
	L92	Shoulder syndrome	0.212811	3.25429	S99	Skin disease, other	0.238766	2.27998
	L99	Musculoskeletal disease, other	0.206068	2.63777	L99	Musculoskeletal disease, other	0.2366	2.64953
	T99	Endocrine/metabolic/nutritional disease, other	0.201854	1.37571	F93	Glaucoma	0.205468	1.53285
	K95	Varicose veins of leg	0.198904	2.12384	L89	Osteoarthritis of hip	0.199242	2.93353
	L89	Osteoarthritis of hip	0.193426	2.89834	K95	Varicose veins of leg	0.197347	2.08937
	S77	Malignant neoplasm of skin	0.173198	2.02621	L83	Neck syndrome	0.189226	2.98398
	L83	Neck syndrome	0.171091	3.50932	N93	Carpal tunnel syndrome	0.119924	4.55243
	P74	Anxiety disorder/anxiety state	0.117994	2.14304	L84	Back syndrome without radiating pain	0.116946	3.75389
	S86	Dermatitis, seborrhoeic	0.112094	2.81089	S86	Dermatitis, seborrhoeic	0.111532	2.32038
	N93	Carpal tunnel syndrome	0.0931311	4.48049	H82	Vertiginous syndrome	0.0687602	2.27979
	H82	Vertiginous syndrome	0.0901812	2.70023	N94	Peripheral neuritis/neuropathy	0.0674066	2.26647
	L84	Back syndrome without radiating pain	0.0880742	3.09108	L85	Acquired deformity of spine	0.0576611	3.15966
	L85	Acquired deformity of spine	0.0484619	2.81358	S87	Dermatitis/atopic eczema	0.0373579	2.38662
	S87	Dermatitis/atopic eczema	0.0421408	2.91026
	B75	Benign/unspecified neoplasm, blood	0.0379267	2.57766
	H84	Presbycusis	0.0223346	2.13701
	K81	Heart/arterial murmur NOS	0.0219132	2.12038
	Digestive-respiratory pattern, n=2,285 (13.3%)				Endocrine-metabolic pattern n=3,305 (12.6%)
				O/E	Stable in pattern, n=1,028 (45.0%)			O/E
			Pre*	ratio			Pre*	ratio
	Code&	Disease			Code&	Disease
	R95	Chronic obstructive pulmonary disease	0.53698	2.57904	K86	Hypertension, uncomplicated	0.830862	1.14783
	K86	Hypertension, uncomplicated	0.53523	0.75083	T93	Lipid disorder	0.731921	1.65927
	Y85	Benign prostatic hypertrophy	0.41663	0.926584	T90	Diabetes, non-insulin dependent	0.671104	2.29721
	R99	Respiratory disease, other	0.297593	3.19955	K76	Ischaemic heart disease without angina	0.473828	3.89303
	F92	Cataract	0.256893	0.976866	Y85	Benign prostatic hypertrophy	0.429652	0.90801
	U99	Urinary disease, other	0.248578	0.930374	U99	Urinary disease, other	0.413616	1.71612
	D98	Cholecystitis/cholelithiasis	0.244639	2.8196	K92	Atherosclerosis/peripheral vascular disease	0.327685	3.15902
	T93	Lipid disorder	0.239387	0.641024	K75	Acute myocardial infarction	0.314675	4.51879
	D99	Disease digestive system, other	0.202188	3.0112	F92	Cataract	0.264145	0.966037
	K78	Atrial fibrillation/flutter	0.198687	0.938476	R95	Chronic obstructive pulmonary disease	0.231467	1.25576
	L91	Osteoarthritis, other	0.196061	1.15791	T99	Endocrine/metabolic/nutritional disease,other	0.230257	1.47967
	D92	Diverticular disease	0.187746	2.3471	K74	Ischaemic heart disease with angina	0.216944	4.23114
	L95	Osteoporosis	0.132166	2.59291	K77	Heart failure	0.206051	2.08061
	D75	Malignant neoplasm, colon/rectum	0.11116	2.03618	B82	Anaemia, other/unspecified	0.199092	1.72163
	D72	Viral hepatitis	0.11116	4.13877	K84	Heart disease, other	0.197882	1.11178
	D97	Liver disease NOS	0.107221	4.425	F83	Retinopathy	0.127988	4.80285
	A70	Tuberculosis	0.105908	5.24245	N94	Peripheral neuritis/neuropathy	0.092587	3.11313
	D85	Duodenal ulcer	0.0989059	2.31416	K91	Cerebrovascular disease	0.0901664	2.18679
	R96	Asthma	0.0814004	3.30366
	D86	Peptic ulcer, other	0.0748359	2.20985
	B81	Anaemia, Vit B12/folate deficiency	0.0739606	2.15429
	D81	Congenital anomaly, digestive system	0.0673961	2.6658
	S91	Psoriasis	0.0555799	2.04713
	A79	Malignancy, NOS	0.04814	2.54474
	D77	Malignant neoplasm, digestive other/NOS	0.0468271	4.01004
	R84	Malignant neoplasm, bronchus, lung	0.0424508	3.08074
	P15	Chronic alcohol abuse	0.0407002	3.3675
	L85	Acquired deformity of spine	0.0350109	2.03265
	K93	Pulmonary embolism	0.0258206	2.41655
	Neuropsychiatric pattern, n=2,277 (13.3%)				Neuropsychiatric pattern, n=3,030 (11.6%)
				O/E	Stable in pattern, n=1,131 (49.7%)			O/E
			Pre*	ratio			Pre*	ratio
	Code&	Disease			Code&	Disease
	K86	Hypertension, uncomplicated	0.582345	0.816924	K86	Hypertension, uncomplicated	0.687789	0.950171
	Y85	Benign prostatic hypertrophy	0.504172	1.12128	Y85	Benign prostatic hypertrophy	0.516502	1.09155
	P70	Dementia	0.470795	3.57892	P70	Dementia	0.436634	4.92115
	P76	Depressive disorder	0.346509	2.93069	T93	Lipid disorder	0.422112	0.956931
	T93	Lipid disorder	0.34563	0.925517	P76	Depressive disorder	0.359076	3.14874
	K90	Stroke/cerebrovascular accident	0.333333	2.43766	K90	Stroke/cerebrovascular accident	0.331683	3.10389
	F92	Cataract	0.264383	1.00535	T90	Diabetes, non-insulin dependent	0.262706	0.899251
	N87	Parkinsonism	0.219587	5.01449	F92	Cataract	0.255776	0.935427
	T90	Diabetes, non-insulin dependent	0.209925	0.737365	N87	Parkinsonism	0.228713	6.46243
	K78	Atrial fibrillation/flutter	0.205534	0.970815	H86	Deafness	0.212211	1.30633
	H86	Deafness	0.205534	1.28803	L91	Osteoarthritis, other	0.2033	1.25295
	L91	Osteoarthritis, other	0.202459	1.1957	P71	Organic psychosis, other	0.189109	4.65976
	P71	Organic psychosis, other	0.132631	3.46275	K91	Cerebrovascular disease	0.140264	3.40179
	K91	Cerebrovascular disease	0.122969	2.77117	K89	Transient cerebral ischaemia	0.123102	2.71187
	K89	Transient cerebral ischaemia	0.108037	2.06282	N99	Neurological disease, other	0.118482	4.22231
	N99	Neurological disease, other	0.0966184	3.17008	N88	Epilepsy	0.0755776	5.22323
	N88	Epilepsy	0.0689504	4.83981	A04	Weakness/tiredness, general	0.0660066	2.12658
	A04	Weakness/tiredness, general	0.0645586	2.01036	B81	Anaemia, Vit B12/folate deficiency	0.0551155	2.08017
	K88	Postural hypotension	0.0483092	4.6223	K88	Postural hypotension	0.0376238	3.62309
	Cardiovascular pattern, n=1,947 (11.4%)				Cardiovascular pattern n=2,860 (10.9%)
				O/E	Stable in pattern, n=1,116 (57.3%)			O/E
			Pre*	ratio			Pre*	ratio
	Code&	Disease			Code&	Disease
	K86	Hypertension, uncomplicated	0.812018	1.13911	K86	Hypertension, uncomplicated	0.86014	1.18827
	K78	Atrial fibrillation/flutter	0.622496	2.94029	K78	Atrial fibrillation/flutter	0.578322	3.32557
	K77	Heart failure	0.51926	3.65982	Y85	Benign prostatic hypertrophy	0.495804	1.04781
	K83	Heart valve disease NOS	0.480226	5.78806	U99	Urinary disease, other	0.482168	2.00054
	Y85	Benign prostatic hypertrophy	0.464818	1.03375	K83	Heart valve disease NOS	0.451049	5.7074
	U99	Urinary disease, other	0.461736	1.72818	K77	Heart failure	0.438811	4.43091
	K84	Heart disease, other	0.390858	2.18408	K84	Heart disease, other	0.393007	2.20807
	T93	Lipid disorder	0.330252	0.884337	T93	Lipid disorder	0.390559	0.885401
	F92	Cataract	0.269132	1.02341	T99	Endocrine/metabolic/nutritional disease, other	0.303497	1.95031
	T99	Endocrine/metabolic/nutritional disease, other	0.241911	1.64871	F92	Cataract	0.280769	1.02683
	T90	Diabetes, non-insulin dependent	0.238829	0.838889	K87	Hypertension, complicated	0.254895	4.93092
	R95	Chronic obstructive pulmonary disease	0.23472	1.12733	R95	Chronic obstructive pulmonary disease	0.251748	1.36579
	B82	Anaemia, other/unspecified	0.223421	1.61185	T90	Diabetes, non-insulin dependent	0.245455	0.840197
	K87	Hypertension, complicated	0.213662	4.46812	T82	Obesity	0.220629	1.33278
	K71	Rheumatic fever/heart disease	0.109399	8.182	B82	Anaemia, other/unspecified	0.205594	1.77786
	K80	Cardiac arrhythmia NOS	0.0996405	2.44841	K71	Rheumatic fever/heart disease	0.0965035	7.97387
	T85	Hyperthyroidism/thyrotoxicosis	0.0344119	3.36785	K80	Cardiac arrhythmia NOS	0.086014	2.13147
	K81	Heart/arterial murmur NOS	0.027735	2.68371	K81	Heart/arterial murmur NOS	0.0300699	2.87453
					T85	Hyperthyroidism/thyrotoxicosis	0.0227273	2.23795
